# Supplementary material
Source: PubMed Central journal article supplement (PMC2940645)
Supplement: supp_nop060_nop060supp.pdf [file supp_nop060_nop060supp.pdf]

## SUPPLEMENTAL INFORMATION

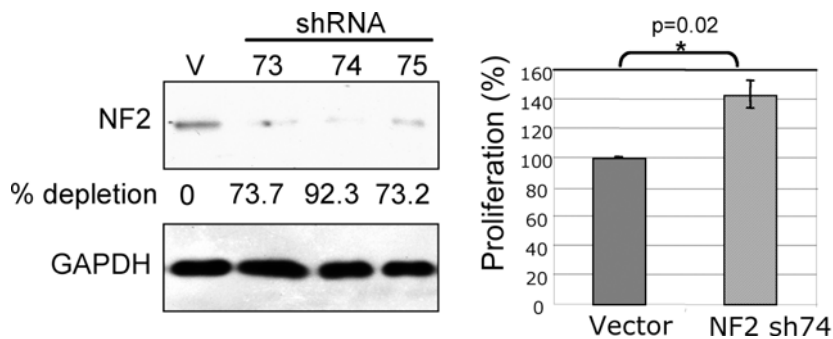

**Fig. S1. NF2 silencing by several shRNAs induces increased cell proliferation.** Left panel shows depletion of NF2 in LN229 cells by several shRNAs. Right graph shows increased proliferation in LN229 cells by NF2 silencing with shRNA74. Means $\pm$ STDs from at least two independent experiments are shown.

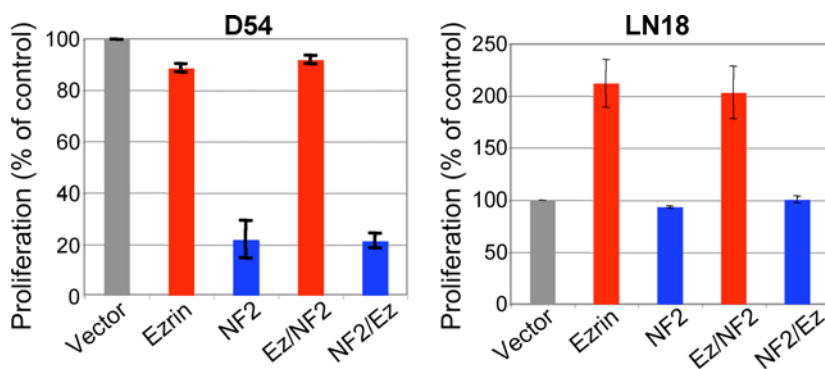

**Fig. S2. The FERM domain controls the opposite phenotype of ezrin and NF2 in GBM cells.** Proliferation studies in NF2-negative D54 and NF2-positive LN18 GBM cells stably expressing ezrin, NF2 and chimeric proteins. Means $\pm$ STDs from at least two independent experiments for each cell line are shown.

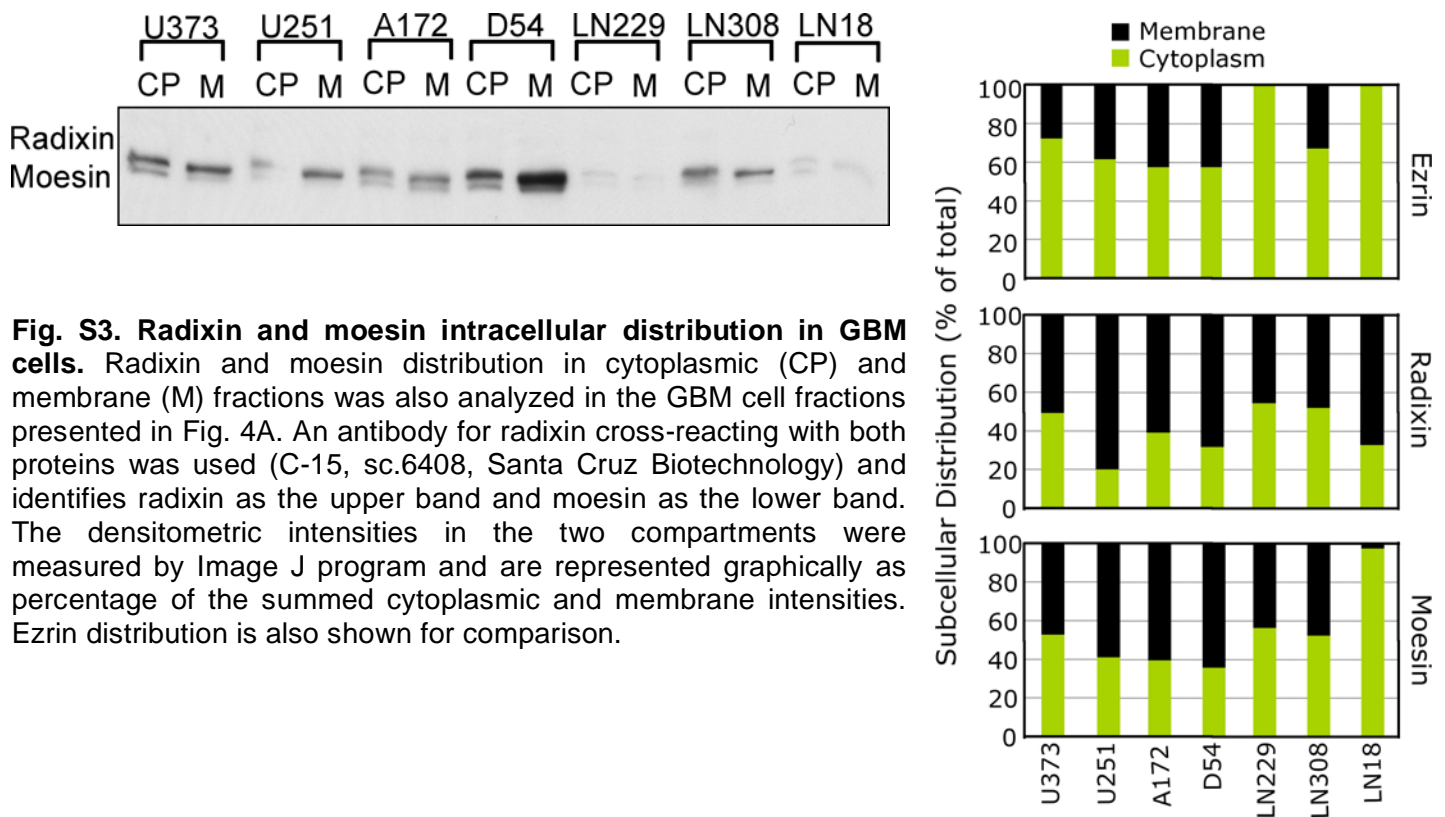

**Fig. S3. Radixin and moesin intracellular distribution in GBM cells.** Radixin and moesin distribution in cytoplasmic (CP) and membrane (M) fractions was also analyzed in the GBM cell fractions presented in Fig. 4A. An antibody for radixin cross-reacting with both proteins was used (C-15, sc.6408, Santa Cruz Biotechnology) and identifies radixin as the upper band and moesin as the lower band. The densitometric intensities in the two compartments were measured by Image J program and are represented graphically as percentage of the summed cytoplasmic and membrane intensities. Ezrin distribution is also shown for comparison.

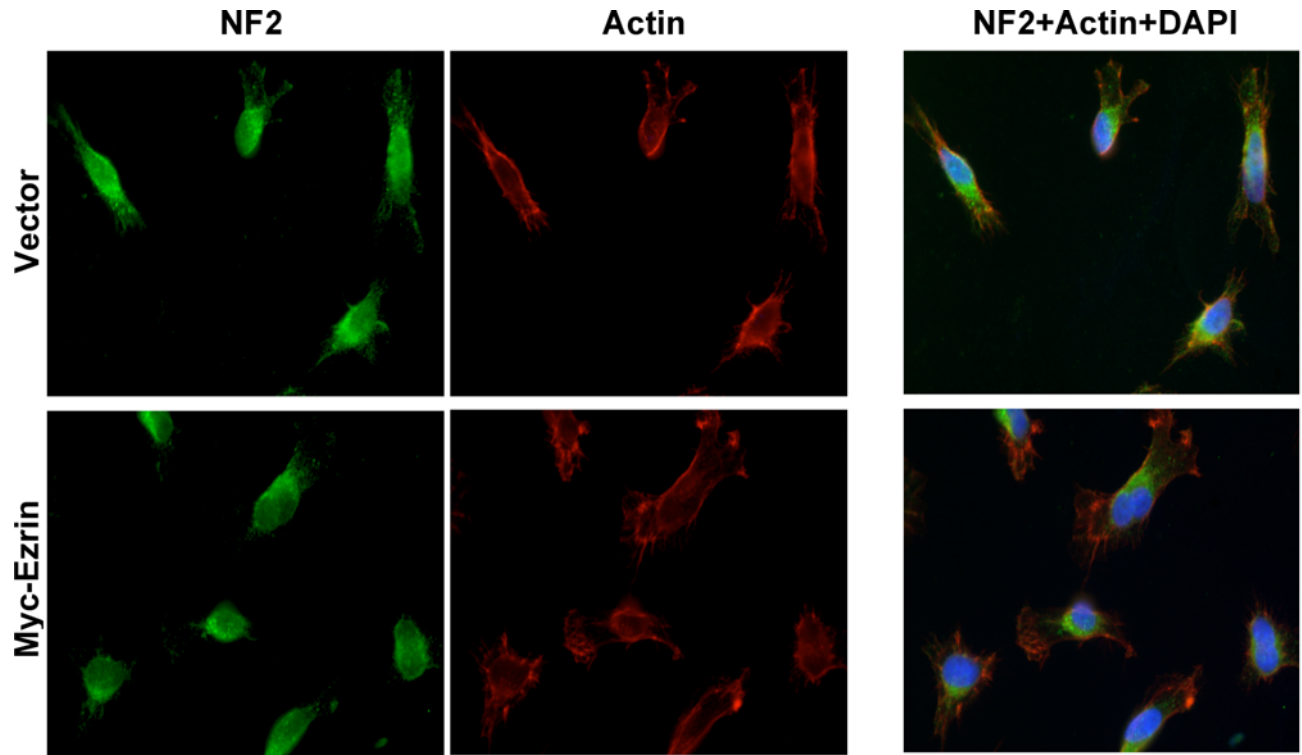

**Fig. S4. Overexpressed ezrin alters endogenous NF2 cellular distribution in LN18 cells.** Immunofluorescence analysis (40X) of LN18 vector control cells (upper panels) showing extended cytoplasmic staining of endogenous NF2 (green) reaching the cell membrane and extensions. Note co-localization of NF2 with cortical actin in the merged image. In contrast, NF2 displayed only perinuclear localization in cells overexpressing Myc-tagged ezrin (Myc-ezrin) (lower panels). Images were acquired as in Fig. 4.

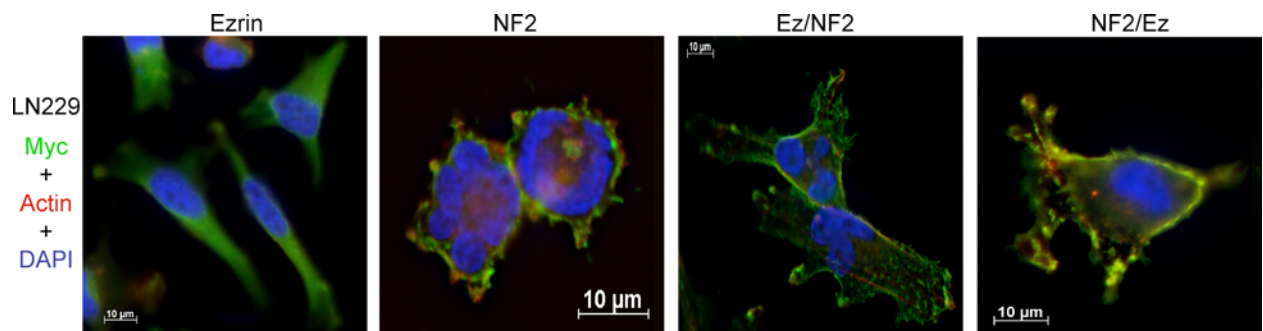

**Fig. S5. Subcellular distribution of ezrin, NF2 and ezrin-NF2 chimera.** Immunofluorescence analysis (63x) of LN229 cells expressing the molecules indicated on top. Images were acquired as in Fig. 5D.

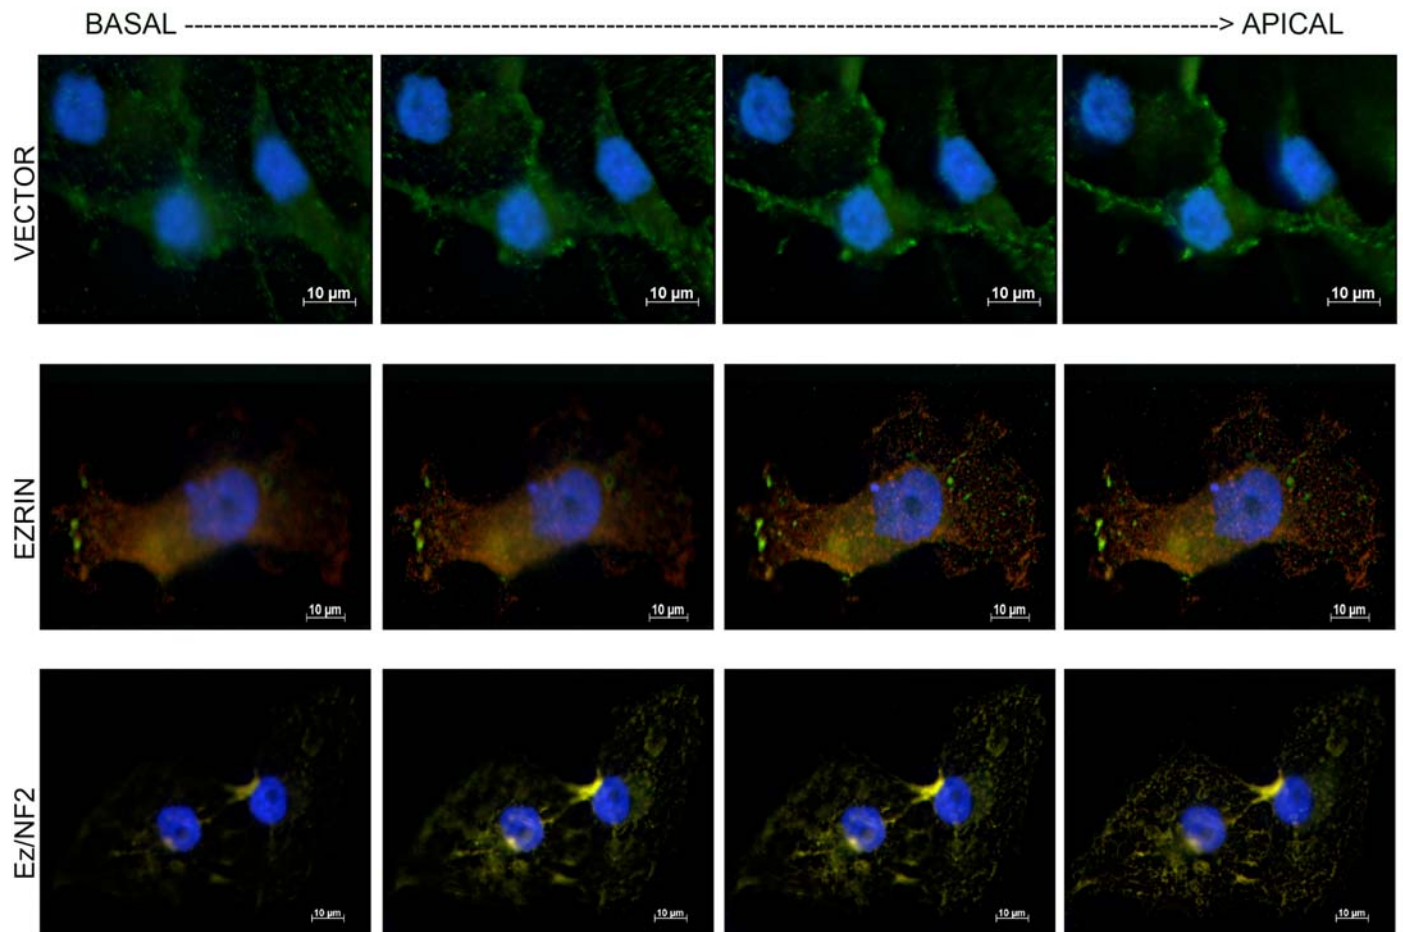

**Fig. S6. Distribution of Ez/NF2 chimera in apical microspikes.** Deconvolution series from basal (left) to apical (right) of the immunofluorescence images (63x) presented in Fig. 5D. LN229 cells expressing the Myc-tagged molecules indicated on the left were labeled for P-ERM (green), Myc (red) and DAPI (blue). Note distinct distribution profiles of ezrin and P-ERM (middle row) and co-localization (yellow) of Ez/NF2 with P-ERM in apical microspike-like structures (bottom row).
